# Supplementary material for: Identification of Residues in the Lipopolysaccharide ABC Transporter That Coordinate ATPase Activity with Extractor Function
Source: PubMed Central journal article supplement (PMC5082905; doi:10.1128/mbio.01729-16), 2016-10-18
Supplement: mbo005163035sf1.pdf [file mbo005163035sf1.pdf]

**A**

| Relevant allele          | Media   | Zone of inhibition (in mm) |            |              |            |
|--------------------------|---------|----------------------------|------------|--------------|------------|
|                          |         | Bacitracin                 | Novobiocin | Erythromycin | Rifampicin |
| <i>lptB</i> <sup>+</sup> | LB      | <6                         | <6         | (8)          | 8 (9)      |
| <i>lptB</i> (R150A)      | LB      | 10                         | (10)       | 11 (17)      | 10 (11)    |
| <i>lptB</i> <sup>+</sup> | M63gluc | <6                         | (14)       | (13)         | 8 (9)      |
| <i>lptB</i> (F90I)       | M63gluc | 19                         | (19)       | (34)         | 35         |
| <i>lptB</i> (L93F)       | M63gluc | 13                         | (14)       | (24)         | 22 (30)    |

**B**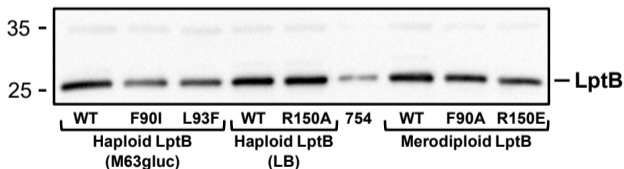**FIG S1**
