# Supplementary material for: Identification of Residues in the Lipopolysaccharide ABC Transporter That Coordinate ATPase Activity with Extractor Function
Source: PubMed Central journal article supplement (PMC5082905; doi:10.1128/mbio.01729-16), 2016-10-18
Supplement: mbo005163035sf3.pdf [file mbo005163035sf3.pdf]

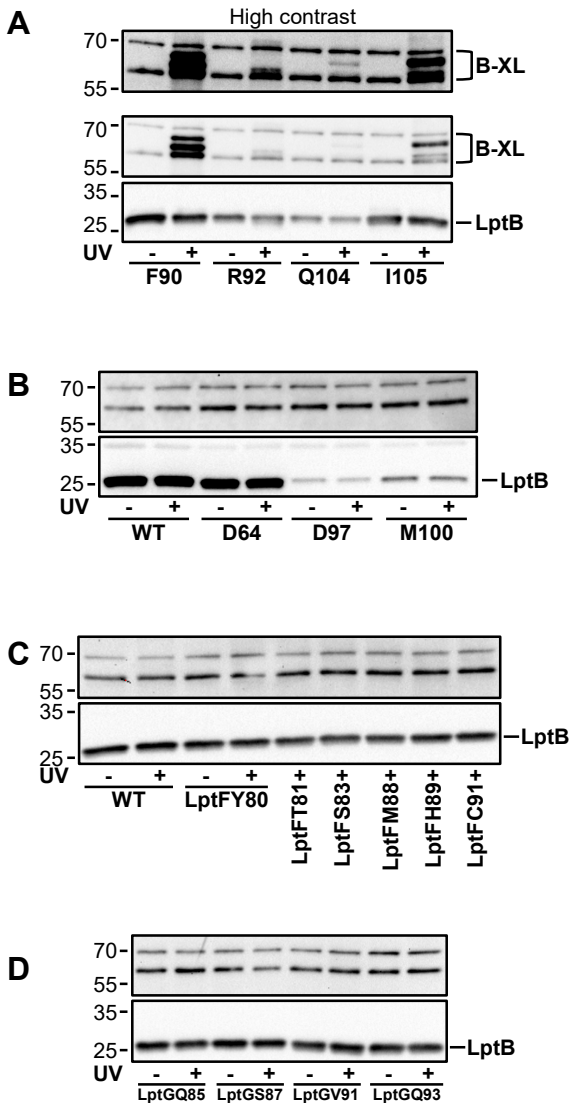

**FIG S3**
