# Supplementary material for: Identification of Residues in the Lipopolysaccharide ABC Transporter That Coordinate ATPase Activity with Extractor Function
Source: PubMed Central journal article supplement (PMC5082905; doi:10.1128/mbio.01729-16), 2016-10-18

**A**

| Species                                                | Neutral MW |
|--------------------------------------------------------|------------|
| LptB: 79-GIGYLPQEASI(F90pBPA) <b>R</b> -91             | 1553.7878  |
| LptB: 79-GIGYLPQEASI(F90pBPA) <b>RR</b> -92            | 1709.8889  |
| LptF: 96-AVLV <b>K</b>                                 | 528.3635   |
| LptF: 101-AAMILAVFTAIVA AVNVMWAGPWSSR-126              | 2731.4342  |
| LptF: 96-AVLV <b>K</b> AAMILAVFTAIVA AVNVMWAGPWSSR-126 | 3241.7872  |
| Oxidation of Met                                       | 15.9959    |
| Proton for ionization                                  | 1.0073     |
| Predicted mass of cross-linked adduct                  | 4968.6793  |
| Observed mass                                          | 4969.04    |

**B**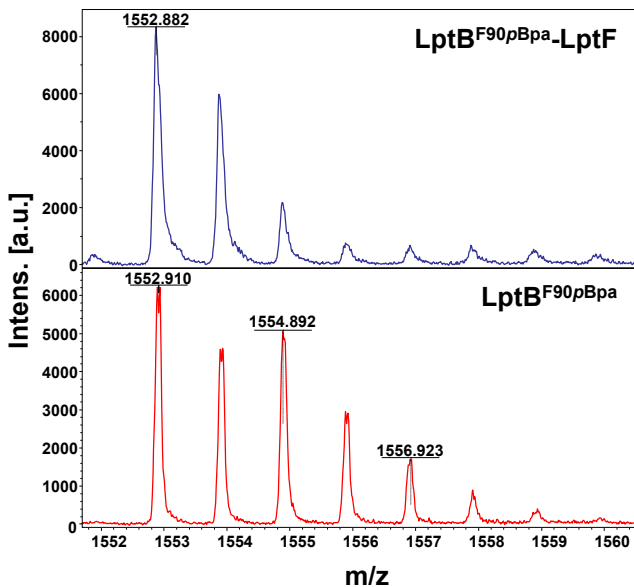**FIGS6**

Fig. S6.

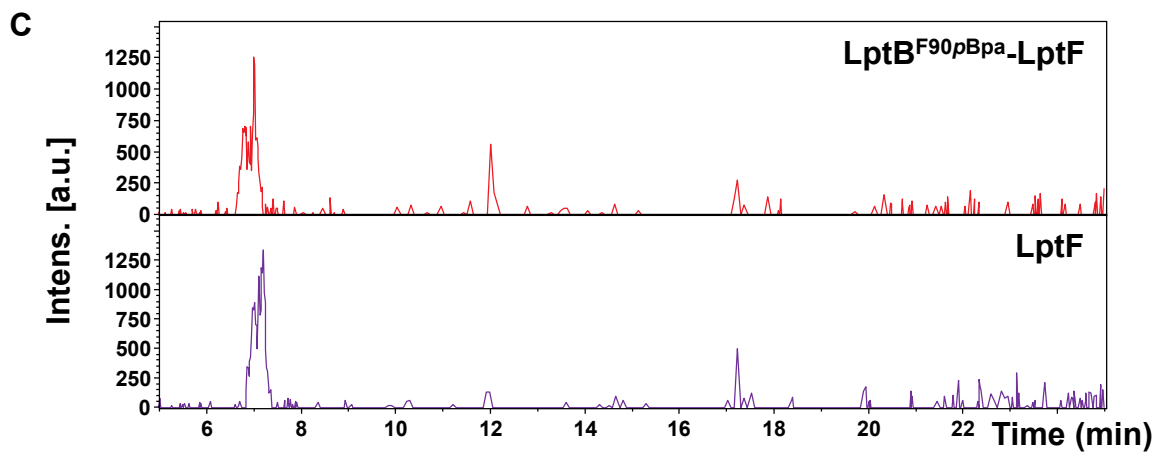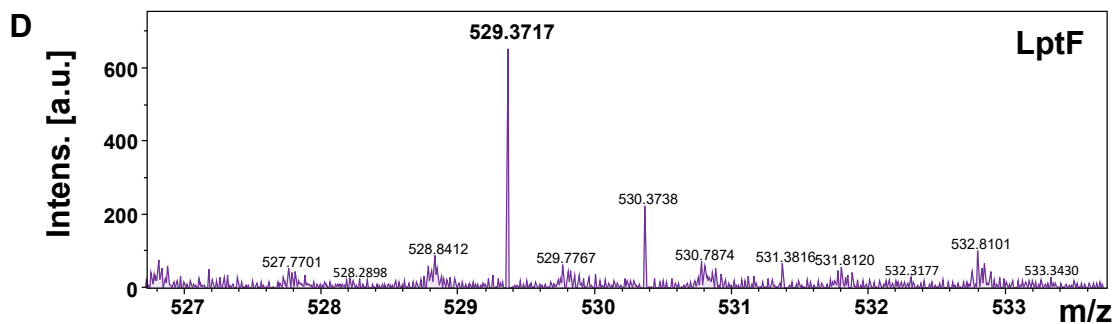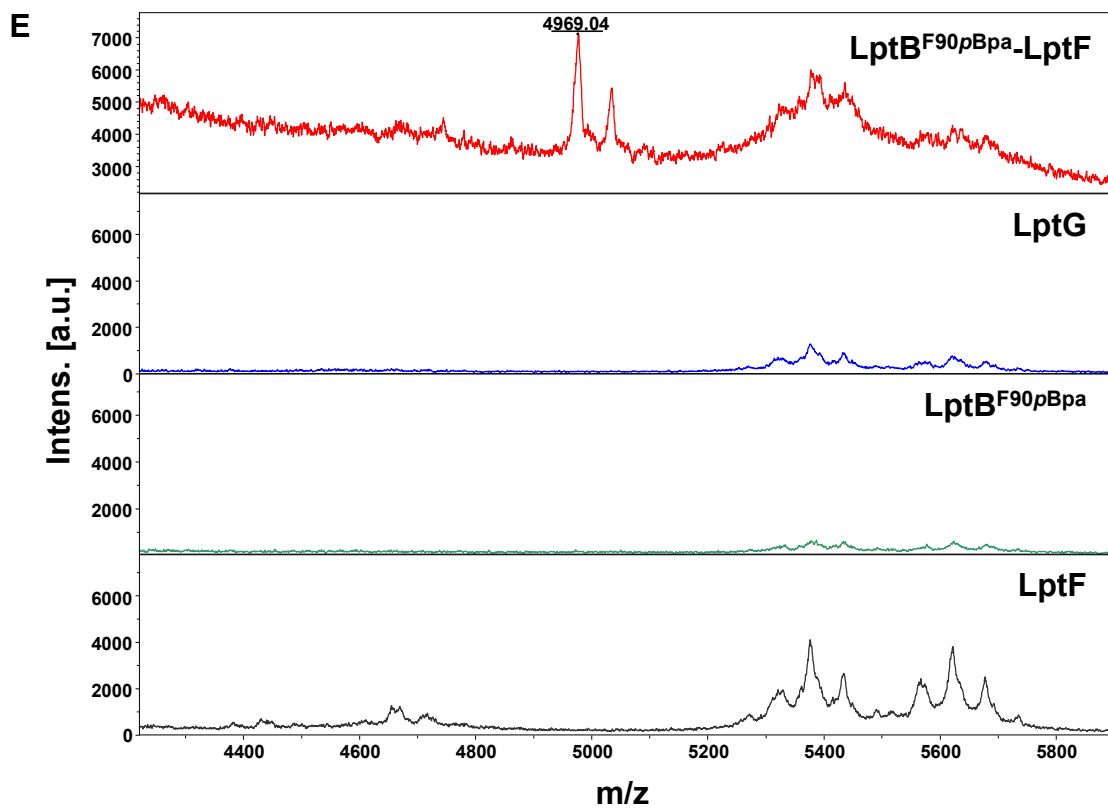

Supplement: mbo005163035sf6.pdf [file mbo005163035sf6.pdf]
