# Supplementary material for: Identification of Residues in the Lipopolysaccharide ABC Transporter That Coordinate ATPase Activity with Extractor Function
Source: PubMed Central journal article supplement (PMC5082905; doi:10.1128/mbio.01729-16), 2016-10-18
Supplement: mbo005163035sf7.pdf [file mbo005163035sf7.pdf]

**A**

LptF 77G K L Y T E S E I T V M H A C G 92  
 LptG 81G M L A Q R S E L V V M Q A S G 96

| Relevant alleles                      | Media   | Zone of inhibition (in mm) |            |              |            |
|---------------------------------------|---------|----------------------------|------------|--------------|------------|
|                                       |         | Bacitracin                 | Novobiocin | Erythromycin | Rifampicin |
| <i>lptFG</i> <sup>+</sup>             | LB      | <6                         | (8)        | (13)         | 10(11)     |
| <i>lptF</i> (Y80A)                    | LB      | 8                          | (8)        | (16)         | 11         |
| <i>lptF</i> (E84A)                    | LB      | 15                         | (8)        | (18)         | 13(20)     |
| <i>lptF</i> (E84D)                    | LB      | 17(22)                     | 11(13)     | 10(24)       | 11(24)     |
| <i>lptF</i> (A90C)                    | LB      | 8(9)                       | (11)       | 8(16)        | 11(12)     |
| <i>lptF</i> (C91A)                    | LB      | 9                          | 8(10)      | 10(14)       | 11(12)     |
| <i>lptF</i> (C91S)                    | LB      | 9(10)                      | 9(11)      | 10(14)       | 11(12)     |
| <i>lptG</i> (L83C)                    | LB      | 9(11)                      | 10         | 9(17)        | 10(14)     |
| <i>lptG</i> (A84Y)                    | LB      | 11(16)                     | 13         | 10(20)       | 10(15)     |
| <i>lptG</i> (E88A)                    | LB      | 10                         | (14)       | 11(23)       | 11(17)     |
| <i>lptG</i> (E88D)                    | LB      | 17(19)                     | 17         | 10(27)       | 12(27)     |
| <i>lptG</i> (L89C)                    | LB      | 11(19)                     | 12         | 10(22)       | 11(16)     |
| <i>lptG</i> (S95C)                    | LB      | 9(10)                      | (9)        | 9(16)        | 11(12)     |
| <i>lptG</i> (G96A)                    | LB      | 11(23)                     | 11         | 11(18)       | 10(15)     |
| <i>lptFG</i> <sup>+</sup>             | M63gluc | <6                         | (14)       | (13)         | 10         |
| <i>lptF</i> (E84A) <i>lptG</i> (E88A) | M63gluc | 7 (11)                     | (14)       | (20)         | 17 (24)    |
| <i>lptF</i> (E84D) <i>lptG</i> (E88D) | M63gluc | 13                         | (25)       | (23)         | 16 (26)    |

**B**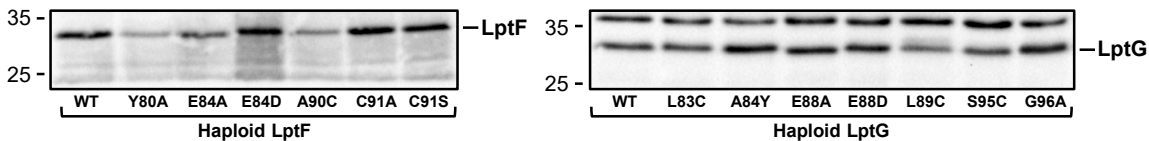**C**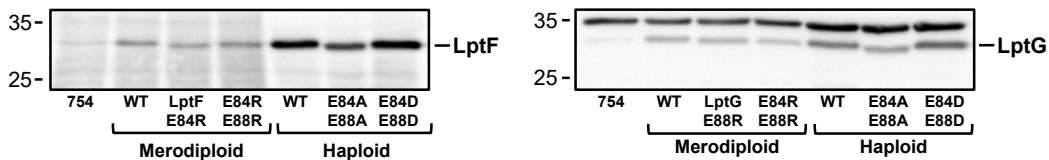**FIG S7**
